# Supplementary material for: Increased Risk of Breakthrough SARS-CoV-2 Infections in Patients with Colorectal Cancer: A Population-Based Propensity-Matched Analysis
Source: MDPI journal article supplement (doi:10.3390/jcm13092495), 2024-04-24
Supplement: s1 [file s1]

Supplementary Table S1: Clinical diagnosis other codes used to determine the status of variables in the TriNetX database.

| Covariate                                    | Name, code                                                                                                                                                                                                                                                                                                                                                                                                                                                                                                                                                |
|----------------------------------------------|-----------------------------------------------------------------------------------------------------------------------------------------------------------------------------------------------------------------------------------------------------------------------------------------------------------------------------------------------------------------------------------------------------------------------------------------------------------------------------------------------------------------------------------------------------------|
| Age at Index                                 | Age at Index                                                                                                                                                                                                                                                                                                                                                                                                                                                                                                                                              |
| Male                                         | M                                                                                                                                                                                                                                                                                                                                                                                                                                                                                                                                                         |
| Female                                       | F                                                                                                                                                                                                                                                                                                                                                                                                                                                                                                                                                         |
| White                                        | White (Demographics: 2106-3)                                                                                                                                                                                                                                                                                                                                                                                                                                                                                                                              |
| Black or African American                    | Black or African American (Demographics: 2054-5)                                                                                                                                                                                                                                                                                                                                                                                                                                                                                                          |
| Asian                                        | Asian (Demographics: 2028-9)                                                                                                                                                                                                                                                                                                                                                                                                                                                                                                                              |
| Hispanic/Latino                              | Hispanic or Latino (Demographics: 2135-2)                                                                                                                                                                                                                                                                                                                                                                                                                                                                                                                 |
| Not Hispanic or Latino                       | Not Hispanic or Latino (Demographics: 2186-5)                                                                                                                                                                                                                                                                                                                                                                                                                                                                                                             |
| Hypertension                                 | Hypertensive diseases (ICD-10 code: I10-I16)                                                                                                                                                                                                                                                                                                                                                                                                                                                                                                              |
| Heart diseases                               | Ischemic heart diseases (ICD-10 code: I20-I25)                                                                                                                                                                                                                                                                                                                                                                                                                                                                                                            |
| Cerebrovascular diseases                     | Cerebrovascular diseases (ICD-10 code: I60-I69)                                                                                                                                                                                                                                                                                                                                                                                                                                                                                                           |
| Type 2 diabetes                              | Type 2 diabetes mellitus (ICD-10 code: E11)                                                                                                                                                                                                                                                                                                                                                                                                                                                                                                               |
| Obesity/overweight                           | Overweight and obesity (ICD-10 code: E66)                                                                                                                                                                                                                                                                                                                                                                                                                                                                                                                 |
| Chronic kidney diseases                      | Chronic kidney disease (CKD) (ICD-10 code: N18)                                                                                                                                                                                                                                                                                                                                                                                                                                                                                                           |
| Chronic lower respiratory diseases           | Chronic lower respiratory diseases (ICD-10 code: J40-J47)                                                                                                                                                                                                                                                                                                                                                                                                                                                                                                 |
| Liver diseases                               | Diseases of liver (ICD-10 code: K70-K77)                                                                                                                                                                                                                                                                                                                                                                                                                                                                                                                  |
| HIV infection                                | Human immunodeficiency virus [HIV] disease (ICD-10 code: B20)                                                                                                                                                                                                                                                                                                                                                                                                                                                                                             |
| Dementia                                     | Vascular dementia (F01),<br>Dementia in other diseases classified elsewhere (F02)<br>Unspecified dementia (F03) Alzheimer's disease (G30)                                                                                                                                                                                                                                                                                                                                                                                                                 |
| Depression                                   | Depressive episode (F32)                                                                                                                                                                                                                                                                                                                                                                                                                                                                                                                                  |
| Anxiety                                      | Anxiety, dissociative, stress-related, somatoform and other nonpsychotic mental disorders (ICD-10 code: F40-F48)                                                                                                                                                                                                                                                                                                                                                                                                                                          |
| Substance use disorders                      | Mental and behavioral disorders due to psychoactive substance use (F10-F19)                                                                                                                                                                                                                                                                                                                                                                                                                                                                               |
| Alcohol abuse                                | Alcohol abuse (F10.1)                                                                                                                                                                                                                                                                                                                                                                                                                                                                                                                                     |
| Tobacco use                                  | Tobacco use (ICD-10 code: Z72.0)                                                                                                                                                                                                                                                                                                                                                                                                                                                                                                                          |
| Adverse socioeconomic determinants of health | Persons with potential health hazards related to socioeconomic and psychosocial circumstances (ICD-10 code: Z55-Z65) Z55: Problems related to education and literacy Z56: Problems related to employment and unemployment Z57: Occupational exposure to risk factors (noise, radiation, dust, other air contaminants, toxic agents in agriculture, extreme temperature, etc). Z58: Problems related to physical environment Z59: Problems related to housing and economic circumstances Z60: Problems related to social environment Z62: Problems related |

|                      |                                                                                                                                                                                                                                                                                                                                                                                                                                                                                                                                                                                                                                                                                                                                                                                                                                                                                                                                                                             |
|----------------------|-----------------------------------------------------------------------------------------------------------------------------------------------------------------------------------------------------------------------------------------------------------------------------------------------------------------------------------------------------------------------------------------------------------------------------------------------------------------------------------------------------------------------------------------------------------------------------------------------------------------------------------------------------------------------------------------------------------------------------------------------------------------------------------------------------------------------------------------------------------------------------------------------------------------------------------------------------------------------------|
|                      | to upbringing Z63: Other problems related to primary support groups Z64-Z65: Problems related to psychosocial circumstances                                                                                                                                                                                                                                                                                                                                                                                                                                                                                                                                                                                                                                                                                                                                                                                                                                                 |
| Chemotherapy         | Chemotherapy (code 1002)                                                                                                                                                                                                                                                                                                                                                                                                                                                                                                                                                                                                                                                                                                                                                                                                                                                                                                                                                    |
| Stem cell transplant | Stem Cell Transplant (code 1005)                                                                                                                                                                                                                                                                                                                                                                                                                                                                                                                                                                                                                                                                                                                                                                                                                                                                                                                                            |
| Targeted therapy     | Targeted Therapy (code 1003)                                                                                                                                                                                                                                                                                                                                                                                                                                                                                                                                                                                                                                                                                                                                                                                                                                                                                                                                                |
| Radiation            | Radiation (code 1001)                                                                                                                                                                                                                                                                                                                                                                                                                                                                                                                                                                                                                                                                                                                                                                                                                                                                                                                                                       |
| Hormone therapy      | Hormone Therapy (code 1004)                                                                                                                                                                                                                                                                                                                                                                                                                                                                                                                                                                                                                                                                                                                                                                                                                                                                                                                                                 |
| Immunotherapy        | Pembrolizumab (RxNorm code: 1547545), Nivolumab (1597876), Cemiplimab (2058826), Atezolizumab (1792776), Avelumab (1875534), Durvalumab (1919503), Ipilimumab (1094833) Chimeric antigen receptor T-cell (CAR-T) therapy (CPT code 1035206)                                                                                                                                                                                                                                                                                                                                                                                                                                                                                                                                                                                                                                                                                                                                 |
| Colorectal cancer    | C18-C20                                                                                                                                                                                                                                                                                                                                                                                                                                                                                                                                                                                                                                                                                                                                                                                                                                                                                                                                                                     |
| Vaccines             | <p>Pfizer-BioNTech vaccine : Immunization administration by intramuscular injection of severe acute respiratory syndrome coronavirus 2 (SARSCoV-2) (Coronavirus disease [COVID-19]) vaccine, mRNA LNP, spike protein, preservative free, 100 mcg/0.5mL dosage; second dose (CPT code: 0012A)</p> <p>Moderna vaccine: Immunization administration by intramuscular injection of severe acute respiratory syndrome coronavirus 2 (SARSCoV-2) (Coronavirus disease [COVID-19]) vaccine, mRNA LNP, spike protein, preservative free, 30 mcg/0.3mL dosage, diluent reconstituted; second dose (CPT code: 0002A)</p> <p>Johnson &amp; Johnson vaccine: Immunization administration by intramuscular injection of severe acute respiratory syndrome coronavirus 2 (SARSCoV-2) (coronavirus disease [COVID-19]) vaccine, DNA, spike protein, adenovirus type 26 (Ad26) vector, preservative free, 5x10<sup>10</sup> viral particles/0.5mL dosage, single dose (CPT code: 0031A)</p> |

Supplementary Table S2: Clinical and demographic characteristics of patients with breakthrough SARS-CoV-2 infections.

|                                                       | Before Matching              |                                   |         | After Matching               |                                  |         |
|-------------------------------------------------------|------------------------------|-----------------------------------|---------|------------------------------|----------------------------------|---------|
|                                                       | With CRC<br>(n,%)<br>n=1,795 | Without CRC<br>(n,%)<br>n=154,443 | P value | With CRC<br>(n,%)<br>n=1,794 | Without CRC (n,<br>%)<br>n=1,794 | P value |
| <b>Demographics</b>                                   |                              |                                   |         |                              |                                  |         |
| Age at Index                                          | Mean: 67.8 +/-<br>12.9       | Mean:55.5 +/- 19.3                | <0.001  | Mean: 67.8 +/-<br>12.9       | Mean: 68.7 +/-<br>12.7           | 0.034   |
| Female                                                | 881 (49.10%)                 | 88,362 (57.20%)                   | <0.001  | 881 (49.10%)                 | 857 (47.80%)                     | 0.423   |
| Hispanic or Latino                                    | 173 (9.60%)                  | 18,715 (12.10%)                   | 0.001   | 173 (9.60%)                  | 151 (8.40%)                      | 0.2     |
| White                                                 | 1,246 (69.40%)               | 103,778 (67.20%)                  | 0.046   | 1,246<br>(69.50%)            | 1,237 (69.00%)                   | 0.745   |
| Black or African<br>American                          | 234 (13.00%)                 | 22,821 (14.80%)                   | 0.039   | 234 (13.00%)                 | 242 (13.50%)                     | 0.694   |
| Asian                                                 | 134 (7.50%)                  | 8,518 (5.50%)                     | <0.001  | 133 (7.40%)                  | 123 (6.90%)                      | 0.517   |
| <b>Diagnosis</b>                                      |                              |                                   |         |                              |                                  |         |
| Obesity                                               | 650 (36.20%)                 | 47,256 (30.60%)                   | <0.001  | 650 (36.20%)                 | 654 (36.50%)                     | 0.89    |
| Diabetes mellitus                                     | 591 (32.90%)                 | 36,544 (23.70%)                   | <0.001  | 591 (32.90%)                 | 612 (34.10%)                     | 0.458   |
| Essential<br>hypertension                             | 1,286 (71.60%)               | 78,490 (50.80%)                   | <0.001  | 1,285(71.60%)                | 1,308 (72.90%)                   | 0.391   |
| Hyperlipidemia                                        | 1,035 (57.70%)               | 62,036 (40.20%)                   | <0.001  | 1,035(57.70%)                | 1,061 (59.10%)                   | 0.378   |
| Heart failure                                         | 360 (20.10%)                 | 19,306 (12.50%)                   | <0.001  | 360 (20.10%)                 | 385 (21.50%)                     | 0.303   |
| Chronic lower<br>respiratory diseases                 | 614 (34.20%)                 | 46,366 (30.00%)                   | <0.001  | 614 (34.20%)                 | 635 (35.40%)                     | 0.462   |
| Ischemic heart<br>diseases                            | 701 (39.10%)                 | 33,186 (21.50%)                   | <0.001  | 701 (39.10%)                 | 733 (40.90%)                     | 0.275   |
| Chronic kidney<br>disease (CKD)                       | 492 (27.40%)                 | 23,655 (15.30%)                   | <0.001  | 492 (27.40%)                 | 541 (30.20%)                     | 0.071   |
| Diseases of liver                                     | 722 (40.20%)                 | 22,526 (14.60%)                   | <0.001  | 721 (40.20%)                 | 692 (38.60%)                     | 0.322   |
| Cerebrovascular<br>diseases                           | 322 (17.90%)                 | 19,334 (12.50%)                   | <0.001  | 322 (17.90%)                 | 345 (19.20%)                     | 0.324   |
| Adverse<br>socioeconomic<br>determinants of<br>health | 130 (7.20%)                  | 9,073 (5.90%)                     | 0.014   | 130 (7.20%)                  | 122 (6.80%)                      | 0.601   |
| Human<br>immunodeficiency<br>virus [HIV] disease      | 22 (1.20%)                   | 1,899 (1.20%)                     | 0.988   | 22 (1.20%)                   | 25 (1.40%)                       | 0.66    |
| Dementia                                              | 53 (3.00%)                   | 3,285 (2.10%)                     | 0.016   | 53 (3.00%)                   | 63 (3.50%)                       | 0.345   |
| Substance use<br>disorders                            | 488 (27.20%)                 | 32,561 (21.10%)                   | <0.001  | 488 (27.20%)                 | 484 (27.00%)                     | 0.881   |
| Depression                                            | 507 (28.20%)                 | 39,498 (25.60%)                   | 0.01    | 507 (28.30%)                 | 522 (29.10%)                     | 0.58    |
| Anxiety                                               | 673 (37.50%)                 | 54,218 (35.10%)                   | 0.035   | 673 (37.50%)                 | 644 (35.90%)                     | 0.315   |
| Alcohol abuse                                         | 88 (4.90%)                   | 7,041 (4.60%)                     | 0.488   | 88 (4.90%)                   | 96 (5.40%)                       | 0.545   |
| Tobacco use                                           | 112 (6.20%)                  | 8,145 (5.30%)                     | 0.069   | 112 (6.20%)                  | 114 (6.40%)                      | 0.891   |
| <b>Procedure</b>                                      |                              |                                   |         |                              |                                  |         |
| Stem Cell Transplant                                  | 13 (0.70%)                   | 872 (0.60%)                       | 0.37    | 13 (0.70%)                   | 14 (0.80%)                       | 0.847   |

|                                                  |                |                 |        |                |                |       |
|--------------------------------------------------|----------------|-----------------|--------|----------------|----------------|-------|
| Chemotherapy                                     | 1,121 (62.50%) | 24,402 (15.80%) | <0.001 | 1,120 (62.40%) | 1,132 (63.10%) | 0.679 |
| Targeted Therapy                                 | 452 (25.20%)   | 14,647 (9.50%)  | <0.001 | 452 (25.20%)   | 455 (25.40%)   | 0.908 |
| Radiation                                        | 427 (23.80%)   | 6,285 (4.10%)   | <0.001 | 426 (23.70%)   | 430 (24.00%)   | 0.875 |
| Hormone Therapy                                  | 210 (11.70%)   | 12,974 (8.40%)  | <0.001 | 210 (11.70%)   | 216 (12.00%)   | 0.757 |
| Chimeric antigen receptor T-cell (CAR-T) therapy | 0 (0.00%)      | 31 (0.00%)      | 0.548  | 0 (0.00%)      | 0 (0.00%)      | --    |
| <b>Medication</b>                                |                |                 |        |                |                |       |
| pembrolizumab                                    | 52 (2.90%)     | 596 (0.40%)     | <0.001 | 52 (2.90%)     | 58 (3.20%)     | 0.561 |
| nivolumab                                        | 19 (1.10%)     | 354 (0.20%)     | <0.001 | 19 (1.10%)     | 21 (1.20%)     | 0.75  |
| cemiplimab                                       | 10 (0.60%)     | 16 (0.00%)      | <0.001 | 10 (0.60%)     | 0 (0.00%)      | 0.002 |
| atezolizumab                                     | 10 (0.60%)     | 121 (0.10%)     | <0.001 | 10 (0.60%)     | 10 (0.60%)     | 1     |
| avelumab                                         | 0 (0.00%)      | 11 (0.00%)      | 0.721  | 0 (0.00%)      | 0 (0.00%)      | --    |
| durvalumab                                       | 10 (0.60%)     | 102 (0.10%)     | <0.001 | 10 (0.60%)     | 10 (0.60%)     | 1     |
| ipilimumab                                       | 10 (0.60%)     | 182 (0.10%)     | <0.001 | 10 (0.60%)     | 10 (0.60%)     | 1     |
